# Supplementary material for: Evaluation of literature searching and article selection skills of an evidence-based practice team
Source: PubMed Central journal article supplement (PMC7441910; doi:10.5195/jmla.2020.865), 2020-07-01
Supplement: jmla-108-3-487-s02.pdf [file jmla-108-3-487-s02.pdf]

## Evaluation of literature searching and article selection skills of an evidence-based practice team

Emily Paige Jones, AHIP; Emily A. Brennan; Amanda Davis

### APPENDIX B

#### Evidence Brief request work flow before and after quality improvement project

| Before quality improvement (QI) project                                                                                                                                                                                                                                                                                                                                                                          | After QI project                                                                                                                                                                                                                                                                                                                                            |
|------------------------------------------------------------------------------------------------------------------------------------------------------------------------------------------------------------------------------------------------------------------------------------------------------------------------------------------------------------------------------------------------------------------|-------------------------------------------------------------------------------------------------------------------------------------------------------------------------------------------------------------------------------------------------------------------------------------------------------------------------------------------------------------|
| <ol style="list-style-type: none"> <li>1. Evidence Brief is requested               <ol style="list-style-type: none"> <li>a. Critical appraisal expert reviews request and seeks clarification from the requestor if necessary</li> <li>b. A preliminary literature search is executed to gauge scope of available literature</li> <li>c. Request is emailed to the mid-career librarian</li> </ol> </li> </ol> | <ol style="list-style-type: none"> <li>1. Evidence Brief is requested               <ol style="list-style-type: none"> <li>a. Critical appraisal expert reviews request and seeks clarification from the requestor if necessary</li> <li>b. Request is entered into LibAnswers queue and assigned to the early career librarian</li> </ol> </li> </ol>      |
| <ol style="list-style-type: none"> <li>2. Librarian performs literature searches in appropriate databases and compiles relevant references in RefWorks</li> </ol>                                                                                                                                                                                                                                                | <ol style="list-style-type: none"> <li>2. Early career librarian performs initial search strategies               <ol style="list-style-type: none"> <li>a. Request is transferred to the mid-career librarian via LibAnswers</li> </ol> </li> </ol>                                                                                                        |
| <ol style="list-style-type: none"> <li>3. Librarian emails databases searched and search strategies, and shares RefWorks folder with critical appraisal expert</li> </ol>                                                                                                                                                                                                                                        | <ol style="list-style-type: none"> <li>3. Mid-career librarian reviews searches and tests various modifications, before finalizing               <ol style="list-style-type: none"> <li>a. Request is transferred back to the critical appraisal expert</li> <li>b. Both librarians meet to discuss the search and any modifications</li> </ol> </li> </ol> |
| <ol style="list-style-type: none"> <li>4. Critical appraisal expert reviews results and, if needed, executes librarian's search strategies to identify additional articles</li> </ol>                                                                                                                                                                                                                            | <ol style="list-style-type: none"> <li>4. Critical appraisal expert executes finalized search               <ol style="list-style-type: none"> <li>a. Relevant articles are identified and appraised</li> </ol> </li> </ol>                                                                                                                                 |
| <ol style="list-style-type: none"> <li>5. Critical appraisal expert evaluates relevant articles using the GRADE criteria</li> </ol>                                                                                                                                                                                                                                                                              | <ol style="list-style-type: none"> <li>5. Critical appraisal expert creates and shares Evidence Brief with clinical requestor</li> </ol>                                                                                                                                                                                                                    |
| <ol style="list-style-type: none"> <li>6. Critical appraisal expert creates and shares Evidence Brief with clinical requestor</li> </ol>                                                                                                                                                                                                                                                                         |                                                                                                                                                                                                                                                                                                                                                             |
