# Supplementary material for: Evaluation of literature searching and article selection skills of an evidence-based practice team
Source: PubMed Central journal article supplement (PMC7441910; doi:10.5195/jmla.2020.865), 2020-07-01

## Evaluation of literature searching and article selection skills of an evidence-based practice team

Emily Paige Jones, AHIP; Emily A. Brennan; Amanda Davis

### APPENDIX C

#### Search strategy comparison

Question: In adult intensive care unit (ICU) patients, what is the effect of neuromuscular electrical stimulation on functional outcomes and length of stay?

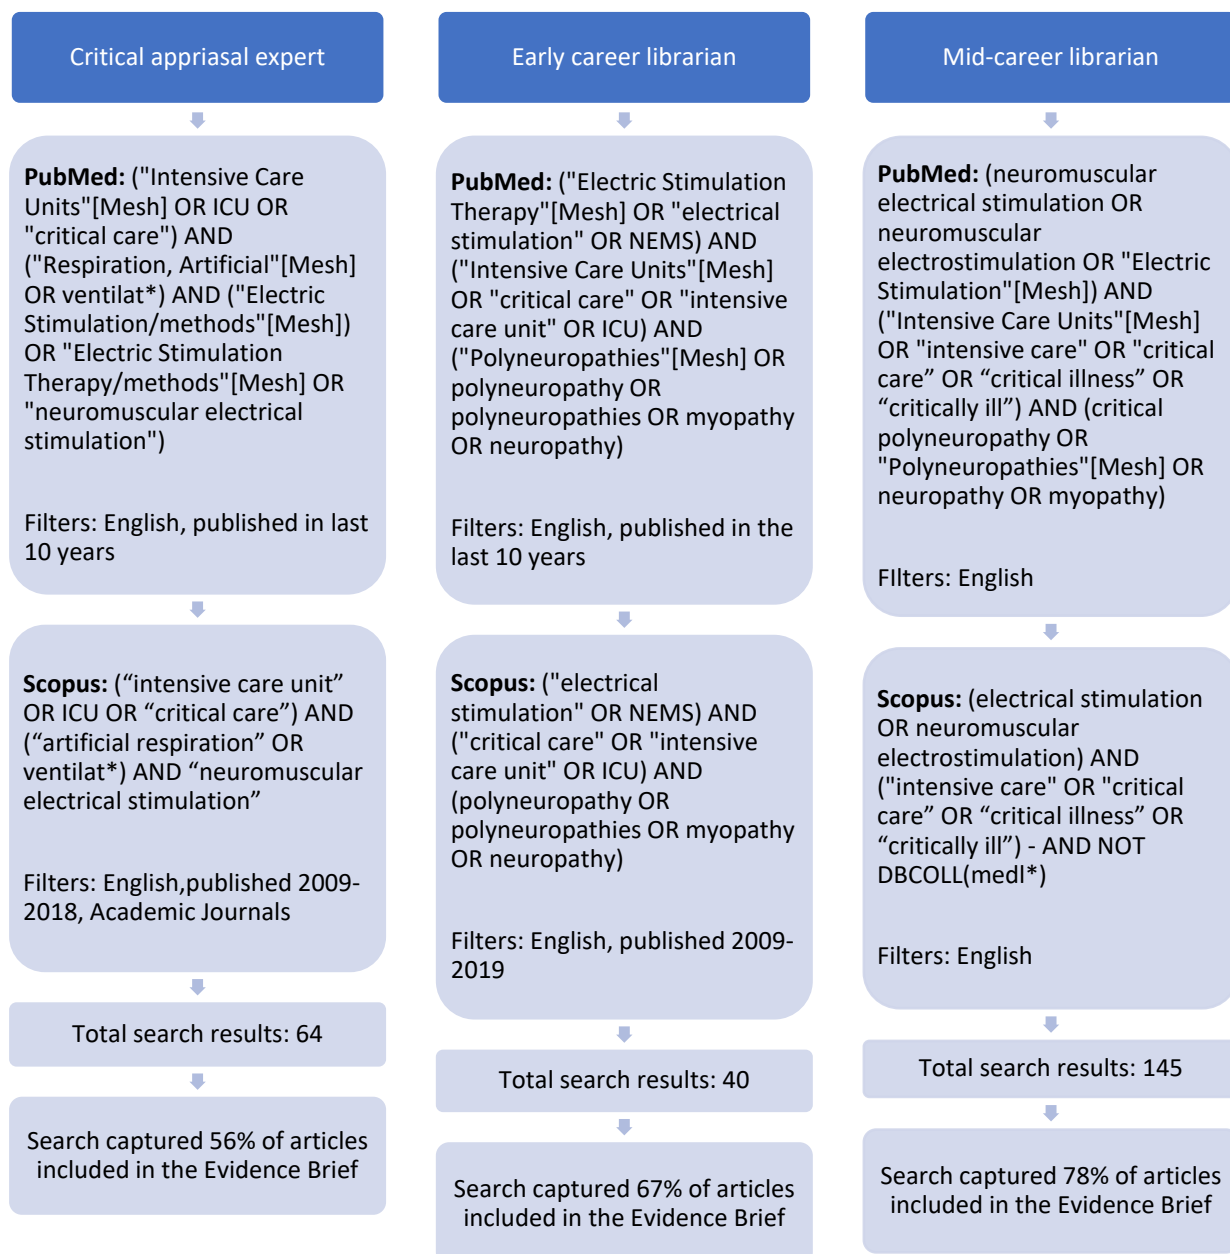

Supplement: jmla-108-3-487-s03.pdf [file jmla-108-3-487-s03.pdf]
